# Supplementary material
Source: publisher figshare collection journal article supplement (https://springernature.figshare.com/ndownloader/files/18096599)
Supplement: Supplementary file 1 [file 18096599]

## Sheet: Sheet1
Supplement Table 1. Major element concentrations for individual points of anslyses.
No.	Sample	Phase	SiO2	TiO2	Al2O3	FeO	MnO	MgO	CaO	Na2O	K2O	SO2	F	Cl
13	JARE54-ASH3	MG	60.5224	1.09637	13.5516	11.1754	0.231642	2.78075	7.21129	2.83944	0.433935	0.0534558	0	0.167704
14	JARE54-ASH3	MG	61.0028	1.10554	13.4065	11.087	0.21058	2.62909	7.07547	2.91021	0.432741	0.0379043	0	0.155829
15	JARE54-ASH3	MG	61.2675	0.979922	13.5582	10.6456	0.284897	2.5526	6.97216	3.13283	0.460219	0.0344381	0.019828	0.150276
21	JARE54-ASH3	MG	61.6028	1.00675	13.8531	10.7688	0.197361	2.48801	6.95067	2.5405	0.45246	0.0409419	0	0.15327
23	JARE54-ASH3	MG	60.7433	1.1177	13.6868	11.001	0.19379	2.58841	7.05397	3.03884	0.434719	0.032473	0	0.161317
26	JARE54-ASH3	MG	61.8526	1.15931	12.6715	11.8412	0.192008	2.07265	6.60093	2.92683	0.515828	0.0217955	0.0394395	0.171251
29	JARE54-ASH3	MG	61.2161	1.10975	13.8009	10.4356	0.189546	2.5827	7.05981	2.99886	0.465924	0.0243551	0.00529459	0.160956
31	JARE54-ASH3	MG	61.3101	1.13289	13.3208	11.0024	0.192215	2.43114	7.09369	2.88215	0.449933	0.0311409	0.0912752	0.150336
32	JARE54-ASH3	MG	59.9852	0.855723	16.8547	8.15824	0.162897	1.83104	7.91905	3.79302	0.352599	0.0154649	0	0.103099
34	JARE54-ASH3	MG	61.0676	1.08171	13.7528	10.8782	0.242221	2.46776	6.89398	3.03708	0.444072	0.0320891	0.00414053	0.150094
37	JARE54-ASH3	MG	60.8919	1.10579	13.6378	10.6621	0.261061	2.64881	7.1537	3.05314	0.43404	0.0562448	0	0.159183
40	JARE54-ASH3	MG	61.1839	1.01523	13.9705	10.4879	0.154078	2.66049	7.10238	2.83145	0.430575	0.0496006	0.0232173	0.161466
44	JARE54-ASH3	MG	61.2501	1.09682	13.6353	10.9714	0.239307	2.48124	6.95985	2.77093	0.446077	0.0577276	0	0.15429
49	JARE54-ASH3	MG	61.3666	1.04852	14.0057	10.5917	0.244376	2.48031	7.00963	2.64532	0.460555	0.0532615	0	0.155607
53	JARE54-ASH3	MG	61.7804	1.2657	13.1824	11.2225	0.16883	2.07001	6.68191	2.9561	0.51488	0.0251673	0.00838909	0.180365
56	JARE54-ASH3	MG	60.2333	1.12835	13.8137	11.2316	0.154383	2.71777	7.0633	3.08559	0.454861	0.0227949	0	0.136769
58	JARE54-ASH3	MG	60.8876	1.06074	13.8255	11.1214	0.231147	2.43812	6.93651	2.89936	0.450683	0.0379967	0.00211093	0.165708
60	JARE54-ASH3	MG	60.8951	0.988454	14.8605	9.98339	0.108309	2.32602	7.17155	3.10206	0.430083	0.0546804	0	0.138804
64	JARE54-ASH3	MG	62.0845	1.08727	13.4688	10.0893	0.181912	2.43741	6.94314	3.07252	0.485799	0.0473181	0	0.161933
68	JARE54-ASH3	MG	60.795	1.05005	14.0121	10.5898	0.18903	2.56021	7.14783	3.08576	0.444532	0.033236	0	0.141253
70	JARE54-ASH3	MG	61.3842	1.07421	13.9912	10.2905	0.257474	2.59162	6.96762	2.87547	0.415757	0.0453744	0.00844176	0.159338
73	JARE54-ASH3	MG	60.6974	1.02651	14.1095	10.6549	0.172311	2.53318	7.08154	3.14046	0.447587	0.0409763	0.00525337	0.144993
74	JARE54-ASH3	MG	59.2203	0.881559	16.5645	9.00906	0.22588	2.08416	8.16514	3.37983	0.356598	0.0376467	0	0.121306
76	JARE54-ASH3	MG	60.5189	1.07267	13.8087	10.81	0.243645	2.70858	7.07837	3.16844	0.442991	0.0516823	0	0.156102
78	JARE54-ASH3	MG	60.2011	1.0472	13.48	11.0463	0.228651	2.79811	7.26568	3.3285	0.457303	0.0428069	0	0.161831
82	JARE54-ASH3	MG	60.7597	1.08243	14.2903	10.5305	0.268784	2.58991	7.03213	2.84515	0.432346	0.0364629	0.0645914	0.145852
84	JARE54-ASH3	MG	60.8221	1.09215	13.9104	10.8401	0.182906	2.70447	7.06356	2.7806	0.447222	0.0454622	0.0264315	0.152246
86	JARE54-ASH3	MG	60.3259	1.08321	14.5008	10.5954	0.243956	2.64703	6.96629	3.04111	0.44204	0.0364891	0.0323189	0.151169
89	JARE54-ASH3	MG	60.6216	1.08581	14.434	10.6274	0.199413	2.58924	6.98155	2.89619	0.434324	0.0501143	0.00104405	0.134682
92	JARE54-ASH3	MG	61.2848	1.10823	13.8811	10.9187	0.207325	2.46118	6.9721	2.55416	0.453122	0.0502282	0	0.172058
95	JARE54-ASH3	MG	60.9639	1.07742	14.0411	10.3863	0.260682	2.51853	6.98796	3.17864	0.454092	0.0189205	0.00735796	0.152415
101	JARE54-ASH3	MG	59.9889	1.01891	13.6463	10.8474	0.165625	3.20454	7.35985	3.13326	0.484297	0.0513648	0	0.161432
104	JARE54-ASH3	MG	60.436	1.06659	14.1243	10.4292	0.246056	2.72122	7.10018	3.30299	0.4233	0.0458749	0.00625567	0.160562
107	JARE54-ASH3	MG	60.7357	1.02028	13.9403	10.6373	0.198769	2.66013	7.26248	2.95934	0.446174	0.0475778	0	0.149077
110	JARE54-ASH3	MG	60.809	1.09469	14.1478	10.4922	0.204202	2.70094	7.06076	2.91567	0.442087	0.0442087	0	0.143152
114	JARE54-ASH3	MG	61.3512	1.09947	13.8653	10.5669	0.153967	2.4676	6.85411	3.05247	0.454668	0.0103334	0.0299667	0.143634
117	JARE54-ASH3	MG	60.621	1.05262	14.1393	10.7527	0.163319	2.68265	7.02274	2.93238	0.465724	0.0442543	0.0526837	0.148568
119	JARE54-ASH3	MG	60.8034	1.06178	14.2136	10.7822	0.161229	2.63163	6.94769	2.78862	0.452925	0.0403072	0.0413679	0.145318
125	JARE54-ASH3	MG	61.7406	1.093	13.9695	10.1927	0.174672	2.43599	6.87286	2.88574	0.46858	0.0366078	0.0104594	0.181993
129	JARE54-ASH3	MG	59.2552	1.03717	14.0517	11.5896	0.197556	3.21764	7.27173	2.75948	0.442399	0.0683039	0	0.184946
131	JARE54-ASH3	MG	60.7498	1.04266	14.3616	10.4382	0.16691	2.65788	7.12429	2.86176	0.441571	0.0612706	0	0.161628
	Mean	MG	60.8593	1.06613	14.0083	10.6435	0.20373	2.55734	7.08389	2.98493	0.446332	0.0406916	0.0117041	0.153947
	1σ	MG	0.611467	0.0670302	0.727829	0.606658	0.0392451	0.251991	0.263938	0.226255	0.0293836	0.0127891	0.0205701	0.0151416
16	JARE54-ASH3	Mt	0.1173	7.13395	5.76047	82.7751	0.222869	3.8197	0.1141	0.0565171	0	0	0	0
35	JARE54-ASH3	Mt	0.890484	9.87034	4.30562	81.5774	0.432919	2.7111	0.211102	0	0.00107158	0	0	0
45	JARE54-ASH3	Mt	0.272741	9.99655	4.24743	82.0907	0.361139	2.77808	0.246868	0	0	0	0	0.00862422
50	JARE54-ASH3	Mt	0.278224	9.91653	4.19797	82.3018	0.367041	2.70198	0.208668	0	0.0192616	0.00642055	0	0.00642055
57	JARE54-ASH3	Mt	0.769494	9.94242	4.13001	81.5	0.4206	2.93564	0.298594	0	0	0.00214046	0	0.00214046
96	JARE54-ASH3	Mt	0.313677	11.8709	4.0854	81.2662	0.349495	1.83865	0.275688	0	0	0	0	0
111	JARE54-ASH3	Mt	0.0880433	9.88447	4.45048	82.2582	0.31352	2.8657	0.132065	0	0	0.0118107	0	0.0010737
120	JARE54-ASH3	Mt	0.354398	10.0449	4.20712	81.9105	0.308739	2.84932	0.258732	0.0532684	0.00217422	0.0217422	0	0
	Mean	Mt	0.385545	9.8325	4.42306	81.96	0.34704	2.81252	0.218227	0.0137232	0.00281343	0.00526424	0	0.00228237
	1σ	Mt	0.291112	1.28355	0.551784	0.496986	0.0669755	0.535307	0.0661492	0.0254252	0.00669289	0.00789505	0	0.00337346
18	JARE54-ASH3	Px	52.1144	0.439243	2.57083	14.489	0.360482	18.8521	11.0073	0.158531	0.00706828	0	0	0.00100975
22	JARE54-ASH3	Px	53.4631	0.232829	1.16613	18.4353	0.521377	22.4282	3.71631	0.0338298	0	0.00497498	0	0
42	JARE54-ASH3	Px	52.9964	0.264065	1.33826	20.8552	0.571975	20.1517	3.65705	0.157443	0.00298942	0.00996472	0	0
48	JARE54-ASH3	Px	51.5446	0.489826	2.54689	17.3787	0.423306	17.5813	9.93157	0.0866769	0.0120945	0.00503936	0	0.00302361
52	JARE54-ASH3	Px	52.0341	0.602184	3.15487	19.0773	0.433897	17.0913	7.29413	0.256486	0.0334546	0	0	0.0283858
62	JARE54-ASH3	Px	52.1277	0.388138	1.91239	17.8119	0.52156	18.293	8.81092	0.124325	0	0.0101077	0	0.00606465
67	JARE54-ASH3	Px	53.1295	0.232374	1.45735	20.7995	0.499805	20.2616	3.43052	0.167269	0.0170274	0.00600968	0	0.00300484
71	JARE54-ASH3	Px	53.0763	0.27508	1.23735	19.6304	0.528999	20.6713	4.497	0.0796018	0	0.00604571	0	0.00100762
91	JARE54-ASH3	Px	52.5532	0.471984	4.01534	18.9797	0.550482	15.9471	6.84427	0.562406	0.0626	0.00695555	0	0.0109302
97	JARE54-ASH3	Px	52.8825	0.27041	1.07148	20.8338	0.528622	20.8267	3.56718	0.012199	0	0.00304974	0	0.00711606
103	JARE54-ASH3	Px	53.0487	0.262063	1.73742	19.9328	0.598144	20.2219	4.01096	0.159038	0.0240058	0	0	0.00600144
122	JARE54-ASH3	Px	53.6815	0.52483	4.33214	17.5405	0.430055	16.5918	6.20726	0.556422	0.107004	0.0152863	0	0.0264963
	Mean	Px	52.721	0.371085	2.2117	18.8137	0.497392	19.0765	6.08121	0.196186	0.022187	0.00561948	0	0.00775335
	1σ	Px	0.645227	0.130491	1.12288	1.85223	0.0703695	1.98907	2.70057	0.181813	0.0325466	0.00463861	0	0.00976795
12	JARE54-ASH3	Pl	54.0111	0.0382354	27.5439	1.01582	0	0.133307	12.8998	4.25963	0.0465025	0.00516694	0.0795709	0.00206678
19	JARE54-ASH3	Pl	53.3233	0.0351287	27.6638	1.20057	0	0.198374	13.8014	3.66268	0.073357	0.00309959	0.0619918	0.00413279
25	JARE54-ASH3	Pl	55.2174	0.0464828	26.8082	1.01539	0	0.13635	12.1961	4.4985	0.0506146	0.0020659	0.0516476	0
28	JARE54-ASH3	Pl	54.8934	0.0641424	26.7277	1.07076	0	0.135527	12.696	4.36685	0.0455204	0	0	0
39	JARE54-ASH3	Pl	55.426	0.0839787	26.0407	1.58938	0.00311032	0.243642	12.1209	4.42495	0.0663536	0.00103677	0	0
43	JARE54-ASH3	Pl	54.554	0.051814	27.432	1.05863	0	0.134107	12.5613	4.16646	0.0243831	0.00609576	0.0182873	0.0050798
46	JARE54-ASH3	Pl	54.3102	0.0789646	27.0233	1.22959	0.00307654	0.154853	12.9758	4.15539	0.0574288	0	0.00820412	0.00820412
47	JARE54-ASH3	Pl	55.1034	0.179339	25.4692	2.217	0.0566876	0.42155	12.2734	4.13922	0.0876081	0	0.0608103	0.022675
51	JARE54-ASH3	Pl	54.3586	0.0678698	27.0842	1.19903	0.0380482	0.131626	12.7472	4.30048	0.0586148	0.00411332	0.0205666	0
55	JARE54-ASH3	Pl	54.4173	0.059478	27.3896	1.05625	0.0410193	0.145619	12.7785	4.04861	0.0471722	0	0.027688	0
63	JARE54-ASH3	Pl	55.1843	0.0839013	26.6464	0.857658	0	0.12637	12.6919	4.35147	0.0548984	0.00517909	0	0
69	JARE54-ASH3	Pl	55.1927	0.0398142	26.6694	1.18932	0	0.191925	12.0872	4.5623	0.0459395	0.00612526	0.0265428	0.00408351
75	JARE54-ASH3	Pl	55.8571	0.0895163	26.1295	1.22442	0	0.179033	11.8439	4.61163	0.0473305	0.00617354	0.0216074	0.00205785
77	JARE54-ASH3	Pl	54.4372	0.0299844	27.2041	1.14354	0	0.15716	12.6824	4.30328	0.0382559	0.00827156	0	0
88	JARE54-ASH3	Pl	55.5497	0.066931	26.8789	1.25141	0.0152116	0.20992	11.2008	4.72979	0.0709874	0	0.0233244	0.0172398
94	JARE54-ASH3	Pl	54.2379	0.0446257	27.2466	1.25263	0.0633062	0.162936	12.5564	4.34737	0.0498148	0.00415123	0.0601928	0.00103781
98	JARE54-ASH3	Pl	53.7198	0.0619368	28.0635	1.0137	0	0.119744	12.7858	4.19002	0.0392266	0	0.00722596	0.00309684
99	JARE54-ASH3	Pl	46.4653	0.0187907	32.77	0.901954	0.0156589	0.0626357	18.6247	1.07733	0.0073075	0	0.0970854	0
100	JARE54-ASH3	Pl	52.1129	0.0550295	28.7898	1.09851	0.0186893	0.172357	14.2132	3.4627	0.0280339	0.00207658	0.0789102	0.00207658
102	JARE54-ASH3	Pl	54.8595	0.0423689	26.9301	1.09643	0.0320351	0.152942	12.3459	4.47974	0.0537362	0.00310017	0.0093005	0
106	JARE54-ASH3	Pl	55.5494	0.313335	24.4538	3.22138	0.0796437	0.717841	11.6814	3.79146	0.146712	0.0220068	0.00628766	0.0398218
109	JARE54-ASH3	Pl	54.726	0.051929	27.0204	1.26564	0.0437833	0.214844	12.2827	4.30196	0.0498926	0.00916394	0.0437833	0.0152732
113	JARE54-ASH3	Pl	53.6995	0.0377863	27.9905	1.02227	0.0347226	0.131742	12.9822	4.01863	0.0510626	0.0102125	0.0418713	0.00306376
123	JARE54-ASH3	Pl	46.274	0.0339705	33.183	0.972793	0	0.0679411	18.5181	0.915146	0.0144117	0	0.0360294	0
124	JARE54-ASH3	Pl	52.2688	0.0442451	29.0165	0.937378	0	0.13788	14.2809	3.27928	0.0298397	0.00823164	0	0.00102895
126	JARE54-ASH3	Pl	54.4449	0.0542433	27.0674	1.58943	0.0501494	0.293732	12.2354	4.15217	0.0869939	0	0.0368445	0.00511729
127	JARE54-ASH3	Pl	46.4782	0.0370009	33.1209	0.88391	0.0123336	0.0740017	17.9948	1.36287	0	0	0.0626959	0
128	JARE54-ASH3	Pl	51.5439	0.00412946	29.473	0.948743	0	0.125948	14.5037	3.32112	0.0247768	0	0.0949775	0
	Mean	Pl	53.5077	0.0648204	27.7799	1.23298	0.0181241	0.183354	13.3058	3.83147	0.0498848	0.00379538	0.0348373	0.00485914
	1σ	Pl	2.7114	0.0578525	2.10392	0.475702	0.023694	0.126477	1.94268	1.02521	0.0283148	0.00484863	0.0301821	0.00893659
145	JARE54-ASH1	FeS?	0.0203731	0.00244477	0	66.0373	0.0888266	0.00407461	0.0513401	0	0	67.4618	0	0.00244477
134	JARE54-ASH1	MG	60.5097	1.08492	14.1145	10.947	0.235487	2.56092	7.02887	2.92992	0.423666	0.0431025	0.0441538	0.151385
137	JARE54-ASH1	MG	60.3684	1.10402	13.8375	11.5397	0.228348	2.45984	6.78621	3.08269	0.456695	0.0275241	0.00815528	0.150873
139	JARE54-ASH1	MG	61.2548	0.998121	14.0692	10.3905	0.168977	2.61233	6.92388	2.99331	0.450257	0.0346351	0	0.155333
140	JARE54-ASH1	MG	61.0065	1.04696	13.8614	10.5481	0.243671	2.58539	6.94565	3.17391	0.465659	0.0351051	0	0.13629
143	JARE54-ASH1	MG	60.7432	1.13048	13.9096	10.8282	0.205927	2.61443	7.12572	2.82672	0.461744	0.0477666	0	0.167714
148	JARE54-ASH1	MG	64.0328	0.878877	13.7345	8.19224	0.199185	2.58838	6.51971	3.11817	0.479481	0.160169	0.00308018	0.22588
150	JARE54-ASH1	MG	60.5315	1.06302	14.0835	10.7556	0.177855	2.59381	6.97646	3.26925	0.4359	0.0257017	0	0.128508
154	JARE54-ASH1	MG	60.1582	1.03325	13.5439	11.4226	0.204333	2.73849	7.26331	3.04814	0.44553	0.0505566	0	0.150617
157	JARE54-ASH1	MG	61.2406	1.11045	13.8269	10.3557	0.169301	2.73405	7.12746	2.84657	0.457428	0.0410108	0	0.14196
160	JARE54-ASH1	MG	61.0606	1.12481	14.0993	10.4866	0.199119	2.38943	6.98399	3.05457	0.453313	0.044484	0.00847314	0.155694
163	JARE54-ASH1	MG	63.5071	1.25723	12.4116	10.5377	0.205538	2.1305	6.47288	2.70225	0.684431	0.110594	0.0323436	0.0219101
167	JARE54-ASH1	MG	65.3372	0.769049	12.7969	10.2478	0.202815	1.25704	5.7797	2.82087	0.583736	0.06383	0.0061771	0.219287
169	JARE54-ASH1	MG	60.7974	1.05978	14.2464	10.3721	0.20903	2.60765	6.96384	3.17099	0.432692	0.0543478	0.00731605	0.14005
172	JARE54-ASH1	MG	61.2795	1.00898	14.1184	10.3268	0.198005	2.61198	6.98916	2.88161	0.452884	0.0452884	0	0.141131
	Mean	MG	61.5591	1.04785	13.761	10.4965	0.203399	2.46316	6.84906	2.99421	0.477387	0.0560083	0.00783565	0.149045
	1σ	MG	1.56395	0.116318	0.529328	0.773471	0.0221585	0.378807	0.37597	0.16429	0.0706704	0.0364306	0.013518	0.0465936
144	JARE54-ASH1	Mt	0.0958252	7.24439	5.38431	83.5351	0.262987	3.37837	0.054301	0.0319417	0.00106472	0.0223592	0	0
146	JARE54-ASH1	Mt	0.160886	6.17505	4.12375	85.7394	0.329181	3.32356	0.1376	0	0	0.00105846	0	0.0127015
161	JARE54-ASH1	Mt	0.131772	12.6862	3.20503	81.1099	0.376188	2.41015	0.0648233	0	0	0.00743874	0	0.0148775
164	JARE54-ASH1	Mt	0.232386	12.083	3.64178	81.6566	0.518564	1.55139	0.25713	0.0570205	0	0.00430344	0	0
170	JARE54-ASH1	Mt	0.124964	7.55979	5.24955	83.0252	0.391981	3.54065	0.0619479	0.0405866	0	0.00961261	0	0
	Mean	Mt	0.149166	9.14968	4.32089	83.0132	0.37578	2.84082	0.11516	0.0259098	0.000212945	0.00895449	0	0.0055158
	1σ	Mt	0.0519528	3.0049	0.966756	1.81436	0.0942651	0.845557	0.0862094	0.0253096	0.000476159	0.00816084	0	0.00759189
133	JARE54-ASH1	Px	51.2235	0.5064	3.00137	13.6958	0.351278	16.7262	14.3333	0.153121	0.00500395	0.00700553	0	0
136	JARE54-ASH1	Px	52.0233	0.37499	2.34419	18.8157	0.504331	19.7832	6.03794	0.10227	0.00601588	0.00200529	0	0.00902382
153	JARE54-ASH1	Px	52.8259	0.251276	1.54555	19.6285	0.505544	21.7733	3.42912	0.0348995	0	0	0	0.00797703
156	JARE54-ASH1	Px	53.4044	0.333113	2.36791	19.6356	0.527763	18.0934	5.17529	0.417394	0.0431441	0.00301005	0	0
165	JARE54-ASH1	Px	50.2901	0.755085	3.99159	12.4594	0.347882	14.1908	17.746	0.210137	0	0.00100544	0	0.0100544
	Mean	Px	51.9534	0.444173	2.65012	16.847	0.44736	18.1134	9.34434	0.183564	0.0108328	0.00260526	0	0.00541105
	1σ	Px	1.24206	0.196767	0.910528	3.48459	0.0897544	2.89374	6.30042	0.14579	0.018275	0.00270338	0	0.00499389
142	JARE54-ASH1	Pl	55.019	0.0420862	26.6252	1.19689	0	0.195034	12.5386	4.2969	0.0646691	0.00307948	0.0184769	0.0112914
147	JARE54-ASH1	Pl	49.7096	0.0323815	30.5327	1.45312	0.0151788	0.107264	15.538	2.55409	0.0182146	0.00404768	0.0627391	0.00101192
151	JARE54-ASH1	Pl	45.9985	0.0206744	33.2734	0.912775	0	0.0568546	18.6783	1.02442	0.00930348	0.00206744	0.0341128	0.00723604
152	JARE54-ASH1	Pl	51.8849	0.0470463	29.2352	1.01354	0.0245459	0.148298	14.1364	3.45995	0.0439781	0	0	0.00818197
159	JARE54-ASH1	Pl	55.4208	0.212439	25.3762	2.23164	0.0412503	0.409409	12.2586	3.93528	0.0794068	0.0216564	0.0154689	0.0185626
162	JARE54-ASH1	Pl	51.4019	0.155655	28.1766	1.89858	0.0348175	0.254987	15.4856	2.50686	0.0829476	0.00409618	0	0
166	JARE54-ASH1	Pl	52.9599	0.0144008	28.351	0.918564	0.00308588	0.102863	13.4956	4.08468	0.0298302	0.00617176	0.0555458	0.00617176
	Mean	Pl	51.7707	0.0749547	28.7957	1.37502	0.0169826	0.182101	14.5902	3.12317	0.0469071	0.00587414	0.0266205	0.00749368
	1σ	Pl	3.2405	0.0771355	2.58989	0.516145	0.0170167	0.119623	2.21594	1.16787	0.0294622	0.00721656	0.0251838	0.00629021
